# Supplementary material for: Recurrent Chromosome 22 Deletions in Osteoblastoma Affect Inhibitors of the Wnt/Beta-Catenin Signaling Pathway
Source: PLoS One. 2013 Nov 13;8(11):e80725. doi: 10.1371/journal.pone.0080725 (PMC3827481; doi:10.1371/journal.pone.0080725)
Supplement: Table S3 — Genes with a low expression value in osteoblastoma compared to osteosarcoma. Significance level was set to p<0.001 and FDR (q-value)<0.01. (XLSX) [file pone.0080725.s003.xlsx]

## Sheet: OB vs OS 0.3 0.001
Table S3. Genes with a low expression value in osteoblastoma compared to osteosarcoma. Significance level was set to p<0.001 and FDR (q-value)<0.01.
Probe Set ID	Gene Symbol	Gene Title	Pathway	Gene Ontology Cellular Component	Gene Ontology Molecular Function	Gene Ontology Biological Process	Chromosomal location	p-Value	q-Value	Difference	Fold change	Osteoblastoma	Osteoblastoma	Osteoblastoma	Osteoblastoma	Osteoblastoma	Osteosarcoma	Osteosarcoma	Osteosarcoma	Osteosarcoma	Osteosarcoma	Osteosarcoma	Osteosarcoma	Osteosarcoma	Osteosarcoma	Osteosarcoma	Osteosarcoma	Osteosarcoma	Osteosarcoma	Osteosarcoma	Osteosarcoma	Osteosarcoma	Osteosarcoma	Osteosarcoma	Osteosarcoma	Osteosarcoma
205176_s_at	ITGB3BP	integrin beta 3 binding protein (beta3-endonexin)	---	0000775 // chromosome, centromeric region // inferred from electronic annotation /// 0005624 // membrane fraction // traceable author statement /// 0005634 // nucleus // traceable author statement /// 0005634 // nucleus // inferred from electronic annotation /// 0005643 // nuclear pore // inferred from electronic annotation /// 0005694 // chromosome // inferred from electronic annotation /// 0005…	0004871 // signal transducer activity // traceable author statement /// 0005515 // protein binding // traceable author statement /// 0008022 // protein C-terminus binding // traceable author statement /// 0008565 // protein transporter activity // inferred from electronic annotation	0006350 // transcription // inferred from electronic annotation /// 0006355 // regulation of transcription, DNA-dependent // inferred from electronic annotation /// 0006606 // protein import into nucleus // inferred from electronic annotation /// 0006886 // intracellular protein transport // inferred from electronic annotation /// 0006915 // apoptosis // inferred from electronic annotation /// 00…	1p31	0.000730438338446554	0.00782275897949213	-1.23694	0.424272	7.76334	7.3816	6.95573	7.26466	7.05957	8.23762	9.75339	9.43118	9.27182	8.54202	8.87104	9.15895	9.16144	8.83951	9.02432	8.27121	8.91603	8.00423	8.01417	8.24776	8.0325	8.18164	7.90598	7.29333	7.2802
AFFX-HUMISGF3A/M97935_MB_at	STAT1	signal transducer and activator of transcription 1, 91kDa	---	0005634 // nucleus // inferred from direct assay /// 0005634 // nucleus // inferred from electronic annotation /// 0005634 // nucleus // traceable author statement /// 0005730 // nucleolus // inferred from direct assay /// 0005737 // cytoplasm // traceable author statement /// 0005737 // cytoplasm // inferred from direct assay /// 0005737 // cytoplasm // inferred from electronic annotation	0003677 // DNA binding // inferred from electronic annotation /// 0003677 // DNA binding // traceable author statement /// 0003700 // transcription factor activity // inferred from electronic annotation /// 0003700 // transcription factor activity // traceable author statement /// 0004871 // signal transducer activity // inferred from electronic annotation /// 0005062 // hematopoietin/interferon-…	0006350 // transcription // inferred from electronic annotation /// 0006355 // regulation of transcription, DNA-dependent // inferred from electronic annotation /// 0006366 // transcription from RNA polymerase II promoter // traceable author statement /// 0006919 // caspase activation // traceable author statement /// 0007165 // signal transduction // inferred from electronic annotation /// 00071…	2q32	0.000570129959760602	0.00672139904889055	-1.25067	0.420252	7.32908	7.39591	6.53042	7.29046	7.1162	8.71965	9.49535	8.25398	8.25596	7.79702	7.65928	8.73531	8.85949	7.38177	7.78454	8.45877	7.98989	8.55945	7.78415	9.53414	7.65862	7.86551	9.11882	8.21662	9.53342
203126_at	IMPA2	inositol(myo)-1(or 4)-monophosphatase 2	---	---	0000287 // magnesium ion binding // inferred from electronic annotation /// 0004437 // inositol or phosphatidylinositol phosphatase activity // inferred from electronic annotation /// 0008934 // inositol-1(or 4)-monophosphatase activity // traceable author statement /// 0008934 // inositol-1(or 4)-monophosphatase activity // inferred from electronic annotation /// 0016787 // hydrolase activity //…	0006796 // phosphate metabolic process // traceable author statement /// 0007165 // signal transduction // traceable author statement	18p11	0.000985127971047131	0.00967640492271146	-1.26983	0.414707	6.48909	5.99916	5.76231	5.93189	6.18261	6.7852	6.71504	7.52788	6.63436	6.30094	7.83237	7.02743	7.14833	8.31515	8.30585	7.36322	8.9456	7.71485	7.70676	6.73465	8.05194	6.11027	6.84211	7.24787	7.5471
219863_at	HERC5	hect domain and RLD 5	---	0005622 // intracellular // inferred from electronic annotation /// 0005737 // cytoplasm // inferred from electronic annotation	0016874 // ligase activity // inferred from electronic annotation /// 0016881 // acid-amino acid ligase activity // inferred from electronic annotation	0000079 // regulation of cyclin-dependent protein kinase activity // traceable author statement /// 0006464 // protein modification process // inferred from electronic annotation /// 0006511 // ubiquitin-dependent protein catabolic process // inferred from electronic annotation	4q22	0.000910967293831074	0.00922076651072917	-1.27554	0.413071	6.06499	5.968	6.0741	6.28175	6.14117	8.25321	8.3539	6.81578	7.92361	6.7922	7.02209	6.71383	7.66276	6.95256	7.62693	6.95995	8.09482	7.51639	6.31848	8.05425	7.31731	6.84425	6.4639	6.83265	9.11193
202446_s_at	PLSCR1	phospholipid scramblase 1	---	0005886 // plasma membrane // traceable author statement /// 0016020 // membrane // inferred from electronic annotation /// 0016021 // integral to membrane // inferred from electronic annotation	0005509 // calcium ion binding // non-traceable author statement /// 0005509 // calcium ion binding // inferred from electronic annotation /// 0005515 // protein binding // inferred from physical interaction /// 0017124 // SH3 domain binding // inferred from electronic annotation /// 0017128 // phospholipid scramblase activity // traceable author statement	0009615 // response to virus // inferred from electronic annotation /// 0017121 // phospholipid scrambling // traceable author statement /// 0030168 // platelet activation // non-traceable author statement	3q24	0.000222068742189828	0.00356484009645654	-1.28491	0.410397	8.8472	8.68399	7.74317	8.50872	8.79684	10.116	9.78559	10.3253	10.9044	9.05141	9.41995	9.89814	9.23779	8.81725	9.94208	9.88585	9.71278	9.90941	10.0754	10.4925	9.38536	9.13286	8.87247	10.0795	10.9738
215223_s_at	SOD2	superoxide dismutase 2, mitochondrial	---	0005739 // mitochondrion // inferred from electronic annotation /// 0005739 // mitochondrion // inferred from direct assay /// 0005743 // mitochondrial inner membrane // inferred from electronic annotation /// 0005759 // mitochondrial matrix // inferred from electronic annotation /// 0005759 // mitochondrial matrix // traceable author statement	0004784 // superoxide dismutase activity // inferred from direct assay /// 0004784 // superoxide dismutase activity // inferred from electronic annotation /// 0004784 // superoxide dismutase activity // inferred from mutant phenotype /// 0016491 // oxidoreductase activity // inferred from electronic annotation /// 0030145 // manganese ion binding // inferred from electronic annotation /// 0030145…	0000302 // response to reactive oxygen species // inferred from electronic annotation /// 0000303 // response to superoxide // inferred from electronic annotation /// 0000303 // response to superoxide // inferred from mutant phenotype /// 0001306 // age-dependent response to oxidative stress // inferred from electronic annotation /// 0001315 // age-dependent response to reactive oxygen species //…	6q25	0.000712785483634507	0.00768327209632002	-1.29001	0.408949	7.46807	6.62964	5.89482	7.74492	7.64328	8.18332	8.83037	8.58296	7.53616	9.01605	8.26914	8.12655	7.69958	7.62806	8.06053	8.41003	9.17713	8.72706	9.23878	8.40019	8.33169	7.20299	7.57798	9.45621	8.8683
203138_at	HAT1	histone acetyltransferase 1	---	0005634 // nucleus // traceable author statement /// 0005634 // nucleus // inferred from electronic annotation /// 0005737 // cytoplasm // inferred from electronic annotation	0004402 // histone acetyltransferase activity // traceable author statement /// 0004402 // histone acetyltransferase activity // inferred from electronic annotation /// 0005515 // protein binding // traceable author statement /// 0005515 // protein binding // inferred from electronic annotation /// 0008415 // acyltransferase activity // inferred from electronic annotation /// 0016740 // transfera…	0006323 // DNA packaging // traceable author statement /// 0006348 // chromatin silencing at telomere // inferred from electronic annotation /// 0006475 // internal protein amino acid acetylation // traceable author statement /// 0016573 // histone acetylation // inferred from electronic annotation	2q31	0.000384651984051214	0.00537236955854521	-1.29507	0.407518	7.69801	7.45392	6.79524	7.26234	7.47033	8.6653	8.95972	8.28301	8.13191	9.13595	8.33187	10.3596	9.22329	10.2834	8.23944	8.16243	8.2643	8.17611	8.61076	8.43446	7.96209	8.47546	8.48959	8.17358	8.2584
206917_at	GNA13	guanine nucleotide binding protein (G protein), alpha 13	G13_Signaling_Pathway // GenMAPP /// G_Protein_Signaling // GenMAPP	0016020 // membrane // inferred from electronic annotation /// 0042470 // melanosome // inferred from electronic annotation	0000166 // nucleotide binding // inferred from electronic annotation /// 0003924 // GTPase activity // traceable author statement /// 0004871 // signal transducer activity // inferred from electronic annotation /// 0005515 // protein binding // inferred from physical interaction /// 0005525 // GTP binding // inferred from electronic annotation /// 0019001 // guanyl nucleotide binding // inferred …	0001569 // patterning of blood vessels // inferred from electronic annotation /// 0001701 // in utero embryonic development // inferred from electronic annotation /// 0006928 // cell motion // traceable author statement /// 0007165 // signal transduction // traceable author statement /// 0007165 // signal transduction // inferred from electronic annotation /// 0007186 // G-protein coupled recepto…	17q24	0.000442171869589973	0.00596654822257036	-1.30742	0.404043	6.57028	6.39884	5.65344	6.44483	6.04849	7.97609	8.24581	6.7594	8.04306	8.5167	8.60394	7.67686	7.16205	7.36005	7.14031	7.19238	9.06557	6.64032	7.80471	6.93672	7.2125	6.934	6.94698	7.00683	7.38764
202413_s_at	USP1	ubiquitin specific peptidase 1	---	0005634 // nucleus // inferred from electronic annotation /// 0005634 // nucleus // inferred from direct assay	0004197 // cysteine-type endopeptidase activity // traceable author statement /// 0004221 // ubiquitin thiolesterase activity // inferred from electronic annotation /// 0004843 // ubiquitin-specific protease activity // traceable author statement /// 0008233 // peptidase activity // inferred from electronic annotation /// 0008234 // cysteine-type peptidase activity // inferred from electronic ann…	0006281 // DNA repair // inferred from electronic annotation /// 0006511 // ubiquitin-dependent protein catabolic process // inferred from electronic annotation /// 0006974 // response to DNA damage stimulus // inferred from electronic annotation	1p31	0.000231731488821887	0.00366356448994603	-1.32077	0.400321	8.6026	8.28843	8.11508	8.44261	8.16738	9.5734	10.7652	10.1197	10.6963	9.55052	10.1332	10.5279	10.1981	9.6757	10.2314	8.80775	10.0728	8.7815	9.22148	9.37629	9.16137	9.26953	9.18776	8.68116	8.84874
217356_s_at	PGK1	phosphoglycerate kinase 1	Glycolysis_and_Gluconeogenesis // GenMAPP	0005737 // cytoplasm // inferred from electronic annotation	0000166 // nucleotide binding // inferred from electronic annotation /// 0004618 // phosphoglycerate kinase activity // inferred from sequence or structural similarity /// 0004618 // phosphoglycerate kinase activity // inferred from electronic annotation /// 0004618 // phosphoglycerate kinase activity // traceable author statement /// 0005524 // ATP binding // inferred from sequence or structural…	0006096 // glycolysis // inferred from electronic annotation /// 0016310 // phosphorylation // inferred from sequence or structural similarity	Xq21	0.00042761050079255	0.00581830681406256	-1.3292	0.39799	10.6835	10.2405	9.25008	10.1133	9.92123	10.5461	11.5897	12.1998	11.8254	12.3866	12.1744	10.9952	10.932	10.2723	11.6912	11.7003	11.6738	10.9856	12.0527	10.8045	11.1232	12.3262	10.9063	10.3731	10.86
209421_at	MSH2	mutS homolog 2, colon cancer, nonpolyposis type 1 (E. coli)	---	0005634 // nucleus // inferred from electronic annotation /// 0032301 // MutSalpha complex // inferred from direct assay /// 0032301 // MutSalpha complex // inferred from electronic annotation /// 0032302 // MutSbeta complex // inferred from direct assay /// 0032302 // MutSbeta complex // inferred from electronic annotation	0000166 // nucleotide binding // inferred from electronic annotation /// 0000287 // magnesium ion binding // inferred from direct assay /// 0000400 // four-way junction DNA binding // inferred from direct assay /// 0003677 // DNA binding // inferred from direct assay /// 0003677 // DNA binding // inferred from electronic annotation /// 0003684 // damaged DNA binding // inferred from electronic an…	0001701 // in utero embryonic development // inferred from electronic annotation /// 0002204 // somatic recombination of immunoglobulin genes during immune response // inferred from electronic annotation /// 0006119 // oxidative phosphorylation // inferred from electronic annotation /// 0006164 // purine nucleotide biosynthetic process // inferred from electronic annotation /// 0006281 // DNA rep…	2p21	0.000784864515357689	0.00824737325837065	-1.35554	0.390789	6.23508	6.27055	5.43525	6.42591	5.83478	7.54026	8.81829	8.15036	8.14721	7.87042	7.99476	8.0149	8.24099	7.60322	7.79179	7.16555	7.67278	6.60109	6.49887	6.71051	6.79866	7.18446	6.44019	6.26497	6.40776
220235_s_at	C1orf103	chromosome 1 open reading frame 103	---	---	0005515 // protein binding // inferred from physical interaction	---	1p13	0.000318611272748611	0.00472227422109548	-1.36127	0.38924	5.3241	5.20606	4.85766	5.17531	4.81643	5.87255	7.61305	6.60028	6.21415	6.12202	7.53495	7.42058	7.08322	6.27662	6.27069	6.14638	6.47942	6.50226	7.70697	6.0431	6.29872	6.04413	5.79922	5.21373	5.50154
204240_s_at	SMC2	structural maintenance of chromosomes 2	---	0000228 // nuclear chromosome // inferred from direct assay /// 0000793 // condensed chromosome // inferred from direct assay /// 0000796 // condensin complex // inferred from direct assay /// 0000796 // condensin complex // non-traceable author statement /// 0005634 // nucleus // inferred from direct assay /// 0005634 // nucleus // inferred from electronic annotation /// 0005694 // chromosome //…	0000166 // nucleotide binding // inferred from electronic annotation /// 0005515 // protein binding // inferred from physical interaction /// 0005515 // protein binding // inferred from electronic annotation /// 0005524 // ATP binding // inferred from electronic annotation /// 0046982 // protein heterodimerization activity // inferred from physical interaction	0007049 // cell cycle // inferred from electronic annotation /// 0007067 // mitosis // inferred from electronic annotation /// 0007076 // mitotic chromosome condensation // non-traceable author statement /// 0007076 // mitotic chromosome condensation // inferred from electronic annotation /// 0007076 // mitotic chromosome condensation // traceable author statement /// 0051276 // chromosome organi…	9q31	0.000649303892348811	0.00729572726748668	-1.4136	0.375374	6.96628	6.93042	6.08305	6.76042	6.76686	8.69556	8.4406	7.95945	8.74307	8.62856	9.23494	9.84714	8.87443	7.62895	8.78612	7.37477	8.25382	7.19257	7.33802	7.70115	7.92714	7.9458	7.4623	6.95823	7.30747
202251_at	PRPF3	PRP3 pre-mRNA processing factor 3 homolog (S. cerevisiae)	mRNA_processing_Reactome // GenMAPP	0005634 // nucleus // traceable author statement /// 0005634 // nucleus // inferred from electronic annotation /// 0005681 // spliceosome // non-traceable author statement /// 0005681 // spliceosome // inferred from electronic annotation /// 0016607 // nuclear speck // inferred from electronic annotation /// 0030529 // ribonucleoprotein complex // inferred from electronic annotation	0003676 // nucleic acid binding // inferred from electronic annotation /// 0005515 // protein binding // inferred from physical interaction /// 0031202 // RNA splicing factor activity, transesterification mechanism // traceable author statement	0000398 // nuclear mRNA splicing, via spliceosome // non-traceable author statement /// 0006397 // mRNA processing // inferred from electronic annotation /// 0006397 // mRNA processing // traceable author statement /// 0007601 // visual perception // inferred from electronic annotation /// 0008380 // RNA splicing // traceable author statement /// 0008380 // RNA splicing // inferred from electroni…	1q21	2.8514499046108e-05	0.000928014379419672	-1.44491	0.367316	6.72677	7.07132	7.34643	6.45773	6.5709	9.36048	8.91839	8.68693	9.32301	8.32397	8.08453	8.33798	9.27139	7.73199	8.27077	7.42655	7.9781	8.21803	8.18232	8.04199	8.19	8.28912	7.82537	7.189	7.94084
208456_s_at	RRAS2	related RAS viral (r-ras) oncogene homolog 2	---	0005622 // intracellular // inferred from electronic annotation /// 0005783 // endoplasmic reticulum // non-traceable author statement /// 0005886 // plasma membrane // non-traceable author statement /// 0005886 // plasma membrane // inferred from electronic annotation /// 0016020 // membrane // inferred from electronic annotation	0000166 // nucleotide binding // inferred from electronic annotation /// 0003924 // GTPase activity // traceable author statement /// 0005515 // protein binding // inferred from physical interaction /// 0005515 // protein binding // inferred from electronic annotation /// 0005525 // GTP binding // inferred from electronic annotation	0007264 // small GTPase mediated signal transduction // inferred from electronic annotation /// 0007265 // Ras protein signal transduction // inferred from electronic annotation /// 0009987 // cellular process // inferred from electronic annotation /// 0030335 // positive regulation of cell migration // inferred from electronic annotation	11p15	0.000837274747424442	0.00868672550452858	-1.45317	0.365218	4.86664	4.93908	4.05138	4.78729	4.90642	7.05366	7.22527	5.01023	5.45014	6.0236	6.31325	6.03087	6.94476	6.47824	5.91721	5.39262	7.27184	6.14484	5.55397	5.64815	6.31628	7.85158	6.53692	4.83995	5.26326
201970_s_at	NASP	nuclear autoantigenic sperm protein (histone-binding)	---	0005634 // nucleus // inferred from sequence or structural similarity /// 0005634 // nucleus // inferred from electronic annotation /// 0005737 // cytoplasm // inferred from electronic annotation	0005488 // binding // inferred from electronic annotation /// 0005515 // protein binding // inferred from physical interaction /// 0051879 // Hsp90 protein binding // inferred from sequence or structural similarity	0001824 // blastocyst development // inferred from sequence or structural similarity /// 0006260 // DNA replication // inferred from sequence or structural similarity /// 0006260 // DNA replication // inferred from electronic annotation /// 0006810 // transport // inferred from electronic annotation /// 0007049 // cell cycle // inferred from sequence or structural similarity /// 0007049 // cell c…	1p34	2.36126544437604e-05	0.00084572778154334	-1.47117	0.360689	7.69986	8.31648	7.9686	7.6853	7.63839	9.43273	10.2445	9.86677	10.4914	9.6585	9.74812	9.54841	9.18112	8.93047	9.81707	8.994	9.82392	8.4838	8.72136	9.20251	9.25656	9.50199	8.89648	8.04805	8.81024
214845_s_at	CALU	calumenin	---	0005576 // extracellular region // inferred from electronic annotation /// 0005783 // endoplasmic reticulum // traceable author statement /// 0005783 // endoplasmic reticulum // inferred from direct assay /// 0005783 // endoplasmic reticulum // inferred from electronic annotation /// 0005788 // endoplasmic reticulum lumen // inferred from electronic annotation /// 0005794 // Golgi apparatus // tr…	0005509 // calcium ion binding // inferred from direct assay /// 0005509 // calcium ion binding // inferred from electronic annotation /// 0005509 // calcium ion binding // traceable author statement	---	7q32	0.000643498955739121	0.00729572726748668	-1.47188	0.360513	9.01722	8.21538	6.63931	8.29246	7.74586	9.9913	10.1749	8.62914	10.1525	10.4342	10.3646	9.56586	9.1662	9.45867	9.57724	8.40211	10.0149	8.50762	9.92227	8.51561	9.35541	9.91354	9.95087	8.71781	8.26374
212148_at	PBX1	pre-B-cell leukemia homeobox 1	---	0005634 // nucleus // inferred from electronic annotation /// 0005634 // nucleus // inferred from direct assay /// 0005730 // nucleolus // inferred from direct assay /// 0005737 // cytoplasm // inferred from direct assay	0003677 // DNA binding // inferred from electronic annotation /// 0003677 // DNA binding // inferred from direct assay /// 0003700 // transcription factor activity // non-traceable author statement /// 0003700 // transcription factor activity // inferred from electronic annotation /// 0005515 // protein binding // inferred from physical interaction /// 0030528 // transcription regulator activity …	0006350 // transcription // inferred from electronic annotation /// 0006355 // regulation of transcription, DNA-dependent // inferred from electronic annotation /// 0006700 // C21-steroid hormone biosynthetic process // inferred from electronic annotation /// 0007530 // sex determination // inferred from electronic annotation /// 0030154 // cell differentiation // inferred from electronic annotat…	1q23	0.000174639576698406	0.0031091956350347	-1.47896	0.358747	6.02175	6.86626	6.39362	6.23894	6.34719	8.16185	8.51015	6.793	8.84013	7.00698	7.21427	8.57493	8.64273	8.5964	8.41284	8.30758	8.63498	7.7627	6.8502	7.67429	7.24181	7.73602	8.13538	7.15322	6.80079
203574_at	NFIL3	nuclear factor, interleukin 3 regulated	---	0005634 // nucleus // traceable author statement /// 0005634 // nucleus // inferred from electronic annotation /// 0005634 // nucleus // inferred from direct assay	0003677 // DNA binding // inferred from electronic annotation /// 0003677 // DNA binding // traceable author statement /// 0003700 // transcription factor activity // traceable author statement /// 0003700 // transcription factor activity // inferred from electronic annotation /// 0003714 // transcription corepressor activity // traceable author statement /// 0043565 // sequence-specific DNA bind…	0006350 // transcription // inferred from electronic annotation /// 0006355 // regulation of transcription, DNA-dependent // inferred from electronic annotation /// 0006366 // transcription from RNA polymerase II promoter // traceable author statement /// 0006955 // immune response // traceable author statement /// 0048511 // rhythmic process // inferred from electronic annotation	9q22	0.000337718381542657	0.00487489142052879	-1.5161	0.349629	7.25986	7.17842	6.28233	6.72547	7.06327	7.80246	8.7628	9.7599	7.91625	8.24191	8.95922	7.48084	8.57951	7.87152	8.70159	9.83548	7.80379	8.44612	9.28928	7.19755	8.88425	8.05453	7.50381	7.8466	9.42203
208290_s_at	EIF5	eukaryotic translation initiation factor 5	Translation_Factors // GenMAPP	0005737 // cytoplasm // traceable author statement /// 0005737 // cytoplasm // inferred from direct assay /// 0005829 // cytosol // non-traceable author statement	0000166 // nucleotide binding // inferred from electronic annotation /// 0003743 // translation initiation factor activity // non-traceable author statement /// 0003743 // translation initiation factor activity // inferred from electronic annotation /// 0003924 // GTPase activity // traceable author statement /// 0005488 // binding // inferred from electronic annotation /// 0005525 // GTP binding…	0006412 // translation // inferred from electronic annotation /// 0006413 // translational initiation // inferred from electronic annotation /// 0006413 // translational initiation // non-traceable author statement /// 0006446 // regulation of translational initiation // traceable author statement	14q32	0.000284707235136259	0.00437605565116843	-1.51793	0.349188	7.82228	7.79597	7.83352	8.0934	7.82749	9.2063	10.4105	9.59837	10.1819	10.3841	10.1914	10.3007	8.92035	9.59123	9.34519	8.21717	9.2526	8.66023	10.2993	8.8014	8.97509	9.78433	9.54517	8.4491	7.73471
222077_s_at	RACGAP1	Rac GTPase activating protein 1	S1P_Signaling // GenMAPP	0001669 // acrosome // inferred from electronic annotation /// 0005622 // intracellular // inferred from electronic annotation /// 0005634 // nucleus // inferred from direct assay /// 0005634 // nucleus // inferred from electronic annotation /// 0005737 // cytoplasm // inferred from electronic annotation /// 0005819 // spindle // inferred from electronic annotation /// 0005874 // microtubule // i…	0005096 // GTPase activator activity // inferred from direct assay /// 0005096 // GTPase activator activity // inferred from electronic annotation /// 0005515 // protein binding // inferred from physical interaction /// 0008022 // protein C-terminus binding // inferred from physical interaction /// 0008270 // zinc ion binding // inferred from electronic annotation /// 0019992 // diacylglycerol bi…	0000910 // cytokinesis // inferred from direct assay /// 0000915 // cytokinesis, contractile ring formation // inferred from mutant phenotype /// 0006810 // transport // inferred from electronic annotation /// 0006811 // ion transport // inferred from electronic annotation /// 0007049 // cell cycle // inferred from electronic annotation /// 0007108 // cytokinesis, initiation of separation // infe…	12q13	0.00045334743763196	0.00596654822257036	-1.53683	0.344641	7.26383	7.21038	5.67874	6.55979	5.52577	8.29474	8.57231	8.3901	8.24296	8.78553	8.9983	9.36034	8.33579	7.56136	8.62299	7.87221	7.88341	7.88776	7.60208	7.29239	7.65024	7.72023	7.47196	6.20132	6.94471
218340_s_at	UBA6	ubiquitin-like modifier activating enzyme 6	---	0005737 // cytoplasm // inferred from direct assay	0000166 // nucleotide binding // inferred from electronic annotation /// 0003824 // catalytic activity // inferred from electronic annotation /// 0005488 // binding // inferred from electronic annotation /// 0005524 // ATP binding // inferred from electronic annotation /// 0008641 // small protein activating enzyme activity // inferred from electronic annotation /// 0016874 // ligase activity // …	0006464 // protein modification process // inferred from electronic annotation /// 0006511 // ubiquitin-dependent protein catabolic process // inferred from electronic annotation /// 0008152 // metabolic process // inferred from electronic annotation	4q13	0.00056502929792425	0.00672139904889055	-1.54694	0.342236	5.20774	5.23969	5.56906	6.44553	5.68234	8.55646	8.71928	7.18049	7.66375	6.35526	7.91673	6.27907	6.72636	6.98127	7.23786	5.64152	7.44864	5.83485	7.81016	8.08159	6.75596	7.40196	6.64402	7.21455	7.06641
218499_at	RP6-213H19.1	serine/threonine protein kinase MST4	---	0005737 // cytoplasm // inferred from electronic annotation /// 0005794 // Golgi apparatus // inferred from electronic annotation	0000166 // nucleotide binding // inferred from electronic annotation /// 0000287 // magnesium ion binding // inferred from direct assay /// 0000287 // magnesium ion binding // inferred from electronic annotation /// 0004672 // protein kinase activity // inferred from electronic annotation /// 0004672 // protein kinase activity // inferred from direct assay /// 0004674 // protein serine/threonine …	0006468 // protein amino acid phosphorylation // inferred from direct assay /// 0006468 // protein amino acid phosphorylation // inferred from electronic annotation /// 0006915 // apoptosis // inferred from electronic annotation /// 0042981 // regulation of apoptosis // inferred from direct assay	Xq26	0.000741358150940679	0.00788881109334312	-1.55326	0.340739	6.4482	6.68964	6.15731	6.33066	6.20237	6.87874	8.0584	10.2324	7.76391	8.70597	7.61774	8.28702	7.47567	7.9189	8.78221	7.67559	8.67873	6.35107	8.07231	7.17353	7.78515	9.05826	7.45308	7.16773	7.24155
202990_at	PYGL	phosphorylase, glycogen, liver	Glycogen_Metabolism // GenMAPP	0005625 // soluble fraction // inferred from sequence or structural similarity /// 0005625 // soluble fraction // inferred from electronic annotation /// 0005634 // nucleus // inferred from direct assay /// 0005730 // nucleolus // inferred from direct assay /// 0005737 // cytoplasm // inferred from direct assay /// 0005886 // plasma membrane // inferred from direct assay	0000166 // nucleotide binding // inferred from electronic annotation /// 0002060 // purine binding // inferred from direct assay /// 0003824 // catalytic activity // inferred from electronic annotation /// 0004645 // phosphorylase activity // inferred from electronic annotation /// 0005524 // ATP binding // inferred from direct assay /// 0005536 // glucose binding // non-traceable author statemen…	0005975 // carbohydrate metabolic process // inferred from electronic annotation /// 0005977 // glycogen metabolic process // inferred from mutant phenotype /// 0005977 // glycogen metabolic process // inferred from electronic annotation /// 0042593 // glucose homeostasis // inferred from mutant phenotype	14q22	3.02851724862124e-05	0.00093098863568727	-1.55478	0.340381	6.53599	6.53713	5.95216	6.7447	6.53746	7.67304	8.8406	8.73776	7.85286	7.58078	8.3131	7.76041	6.61994	8.37208	8.10379	7.97914	8.44896	7.54953	8.38891	8.50239	7.73627	8.89814	6.46256	8.16918	8.33587
201559_s_at	CLIC4	chloride intracellular channel 4	---	0005622 // intracellular // inferred from direct assay /// 0005625 // soluble fraction // inferred from direct assay /// 0005737 // cytoplasm // inferred from direct assay /// 0005739 // mitochondrion // inferred from electronic annotation /// 0005902 // microvillus // inferred from direct assay /// 0015629 // actin cytoskeleton // traceable author statement /// 0016020 // membrane // inferred fr…	0005216 // ion channel activity // inferred from electronic annotation /// 0005244 // voltage-gated ion channel activity // inferred from electronic annotation /// 0005247 // voltage-gated chloride channel activity // inferred from electronic annotation /// 0005254 // chloride channel activity // inferred from electronic annotation /// 0005254 // chloride channel activity // traceable author stat…	0006810 // transport // inferred from electronic annotation /// 0006811 // ion transport // inferred from electronic annotation /// 0006821 // chloride transport // non-traceable author statement /// 0006821 // chloride transport // inferred from electronic annotation /// 0030154 // cell differentiation // traceable author statement /// 0030336 // negative regulation of cell migration // inferred…	1p36	0.000481032691929207	0.00614241745078833	-1.57362	0.335965	8.77353	8.6839	5.54751	8.11847	8.24151	9.78409	10.4556	9.80134	10.6249	9.21542	10.4177	9.21305	9.71981	9.49517	9.24916	9.35533	9.83362	8.14284	8.87457	9.24942	9.096	8.97545	9.32503	8.95337	9.1502
206102_at	GINS1	GINS complex subunit 1 (Psf1 homolog)	---	0005634 // nucleus // inferred from direct assay /// 0005634 // nucleus // inferred from electronic annotation /// 0005737 // cytoplasm // inferred from direct assay /// 0005737 // cytoplasm // inferred from electronic annotation	0005515 // protein binding // inferred from electronic annotation	0001833 // inner cell mass cell proliferation // inferred from electronic annotation /// 0006260 // DNA replication // inferred from electronic annotation	20p11	0.000407069176846831	0.00563112361304782	-1.59141	0.331848	6.6162	6.18255	5.24038	5.92137	5.06729	8.07443	8.35601	6.50886	8.21749	7.90384	8.06393	8.21478	8.46943	7.43302	8.24124	7.39511	7.24162	7.1778	6.64761	6.56347	7.25677	7.41449	6.89537	5.84687	6.01717
212599_at	AUTS2	autism susceptibility candidate 2	---	0005634 // nucleus // inferred from direct assay /// 0005737 // cytoplasm // inferred from direct assay	---	---	7q11	0.000811974449816272	0.00847721752638372	-1.62223	0.324833	7.4268	7.93884	7.38047	7.30264	7.56259	8.96199	10.0651	10.1041	9.65616	8.52325	9.55055	6.80592	9.52496	10.0858	9.99124	9.7274	10.377	7.7622	9.07122	9.25382	9.06978	8.46652	9.50571	8.33992	8.04728
201897_s_at	CKS1B	CDC28 protein kinase regulatory subunit 1B	---	0005654 // nucleoplasm // not recorded	0005515 // protein binding // inferred from physical interaction /// 0016301 // kinase activity // inferred from electronic annotation /// 0016538 // cyclin-dependent protein kinase regulator activity // inferred from electronic annotation	0000079 // regulation of cyclin-dependent protein kinase activity // traceable author statement /// 0007049 // cell cycle // inferred from electronic annotation /// 0008283 // cell proliferation // traceable author statement /// 0051301 // cell division // inferred from electronic annotation	1q21	0.000596772373056089	0.00688394685272352	-1.63134	0.322788	8.27714	8.06519	8.01037	7.87119	7.68322	9.54555	10.543	8.78688	10.332	9.94054	9.6021	11.2714	11.1815	9.72511	9.29377	10.1959	9.41968	10.477	8.44569	9.20355	9.37614	9.67908	9.11605	8.01329	8.10702
204825_at	MELK	maternal embryonic leucine zipper kinase	---	0005737 // cytoplasm // inferred from electronic annotation	0000166 // nucleotide binding // inferred from electronic annotation /// 0004672 // protein kinase activity // inferred from electronic annotation /// 0004674 // protein serine/threonine kinase activity // inferred from electronic annotation /// 0005515 // protein binding // inferred from physical interaction /// 0005524 // ATP binding // inferred from electronic annotation /// 0016301 // kinase …	0006468 // protein amino acid phosphorylation // inferred from electronic annotation	9p13	0.000461922390074627	0.00599055599628032	-1.69088	0.309738	7.90043	7.54352	6.7628	7.13276	6.34616	8.91797	10.0569	9.31801	9.77468	9.72908	9.30271	9.87017	9.29631	8.32787	10.006	8.31047	8.14258	9.18752	7.72153	8.5305	8.64321	8.73572	8.1354	7.0087	7.54496
214453_s_at	IFI44	interferon-induced protein 44	---	0005737 // cytoplasm // inferred from electronic annotation	---	0009615 // response to virus // traceable author statement	1p31	4.23756733465195e-05	0.00109513491646431	-1.70292	0.307164	8.55366	8.32241	7.33656	7.80391	8.1072	9.95268	9.82694	9.31654	11.0121	9.4044	8.51066	9.51604	9.49982	9.01726	10.5337	9.86027	10.1925	9.77636	9.38645	10.755	9.67321	8.76467	8.89366	9.57748	11.0836
203560_at	GGH	gamma-glutamyl hydrolase (conjugase, folylpolygammaglutamyl hydrolase)	---	0005576 // extracellular region // inferred from electronic annotation /// 0005764 // lysosome // inferred from electronic annotation /// 0042470 // melanosome // inferred from electronic annotation	0003824 // catalytic activity // inferred from electronic annotation /// 0008238 // exopeptidase activity // traceable author statement /// 0008242 // omega peptidase activity // inferred from electronic annotation /// 0008242 // omega peptidase activity // traceable author statement /// 0016787 // hydrolase activity // inferred from electronic annotation /// 0034722 // gamma-glutamyl-peptidase a…	0006541 // glutamine metabolic process // inferred from electronic annotation	8q12	0.000331604892266832	0.00482863264178019	-1.71494	0.304616	8.16894	7.51032	6.63088	7.53366	7.02598	9.7644	9.07726	9.12167	9.02186	9.0303	9.09843	10.857	10.3488	9.14941	9.98786	9.10474	9.29895	9.43032	9.1378	8.0059	8.50197	9.2439	8.7873	7.87468	6.9353
207828_s_at	CENPF	centromere protein F, 350/400ka (mitosin)	---	0000775 // chromosome, centromeric region // inferred from direct assay /// 0000776 // kinetochore // inferred from direct assay /// 0000777 // condensed chromosome kinetochore // inferred from electronic annotation /// 0000785 // chromatin // non-traceable author statement /// 0000922 // spindle pole // inferred from direct assay /// 0000940 // outer kinetochore of condensed chromosome // inferr…	0003682 // chromatin binding // non-traceable author statement /// 0005515 // protein binding // inferred from physical interaction /// 0008022 // protein C-terminus binding // inferred from physical interaction /// 0008134 // transcription factor binding // inferred from physical interaction /// 0042803 // protein homodimerization activity // inferred from physical interaction /// 0045502 // dyn…	0000085 // G2 phase of mitotic cell cycle // inferred from mutant phenotype /// 0000087 // M phase of mitotic cell cycle // inferred from direct assay /// 0000087 // M phase of mitotic cell cycle // inferred from mutant phenotype /// 0000278 // mitotic cell cycle // inferred from mutant phenotype /// 0007049 // cell cycle // inferred from electronic annotation /// 0007059 // chromosome segregatio…	1q41	0.000920884847389529	0.00926465967676738	-1.73773	0.29984	7.61266	7.54624	6.64169	7.08963	5.94695	10.3944	8.93625	8.42424	9.08544	9.69799	9.29791	9.53972	9.82487	8.10332	8.49115	8.29301	9.36929	8.12293	7.4747	8.00153	9.11976	9.33538	8.77316	6.40649	7.41182
218009_s_at	PRC1	protein regulator of cytokinesis 1	---	0005634 // nucleus // traceable author statement /// 0005634 // nucleus // inferred from electronic annotation /// 0005737 // cytoplasm // inferred from electronic annotation /// 0005874 // microtubule // inferred from electronic annotation /// 0005876 // spindle microtubule // traceable author statement	0005515 // protein binding // inferred from physical interaction	0000022 // mitotic spindle elongation // traceable author statement /// 0000910 // cytokinesis // traceable author statement /// 0007049 // cell cycle // inferred from electronic annotation /// 0051301 // cell division // inferred from electronic annotation	15q26	0.000415284944029709	0.00569729757925056	-1.75083	0.29713	7.65552	7.26671	6.25155	6.64707	5.83626	9.32079	9.03356	9.04235	9.40421	9.41297	8.80864	10.0538	9.15102	7.75755	8.49887	8.3969	8.38575	7.78793	7.86573	7.84356	8.37826	8.62489	8.1468	6.099	7.6325
202095_s_at	BIRC5	baculoviral IAP repeat-containing 5	Apoptosis // GenMAPP	0000775 // chromosome, centromeric region // inferred from sequence or structural similarity /// 0000775 // chromosome, centromeric region // inferred from direct assay /// 0000775 // chromosome, centromeric region // inferred from electronic annotation /// 0005622 // intracellular // inferred from electronic annotation /// 0005634 // nucleus // inferred from electronic annotation /// 0005634 // …	0004866 // endopeptidase inhibitor activity // inferred from electronic annotation /// 0004869 // cysteine protease inhibitor activity // inferred from electronic annotation /// 0004872 // receptor activity // inferred from electronic annotation /// 0004872 // receptor activity // non-traceable author statement /// 0005515 // protein binding // inferred from physical interaction /// 0005515 // pr…	0000086 // G2/M transition of mitotic cell cycle // inferred from sequence or structural similarity /// 0000910 // cytokinesis // inferred from sequence or structural similarity /// 0006915 // apoptosis // inferred from electronic annotation /// 0006916 // anti-apoptosis // inferred from sequence or structural similarity /// 0007049 // cell cycle // inferred from electronic annotation /// 0007067…	17q25	0.00029838210135845	0.00452680714925847	-1.75997	0.295255	7.46041	7.18746	6.488	6.71844	6.03116	9.49244	9.21823	8.5477	8.91907	9.6282	8.95217	9.90856	8.95742	7.92514	8.7597	8.7611	8.11048	8.54273	7.88676	7.35945	8.24348	9.58606	8.26988	6.7648	6.90783
211762_s_at	KPNA2 /// LOC728860	karyopherin alpha 2 (RAG cohort 1, importin alpha 1) /// karyopherin alpha-2 subunit like	---	0005634 // nucleus // inferred from electronic annotation /// 0005634 // nucleus // traceable author statement /// 0005643 // nuclear pore // inferred from electronic annotation /// 0005654 // nucleoplasm // traceable author statement /// 0005737 // cytoplasm // inferred from electronic annotation /// 0005737 // cytoplasm // traceable author statement	0005488 // binding // inferred from electronic annotation /// 0005515 // protein binding // inferred from physical interaction /// 0005515 // protein binding // traceable author statement /// 0008139 // nuclear localization sequence binding // traceable author statement /// 0008565 // protein transporter activity // inferred from electronic annotation	0000018 // regulation of DNA recombination // traceable author statement /// 0000072 // M phase specific microtubule process // traceable author statement /// 0000085 // G2 phase of mitotic cell cycle // traceable author statement /// 0006259 // DNA metabolic process // traceable author statement /// 0006606 // protein import into nucleus // inferred from electronic annotation /// 0006607 // NLS-…	17q24	4.2881788897699e-05	0.00109513491646431	-1.76487	0.294253	9.36628	8.87827	7.56883	8.51199	7.57308	10.3241	10.4393	10.1611	10.304	11.0149	10.6912	10.6058	10.9574	9.66614	10.0691	9.945	11.4387	10.2165	9.83704	9.49308	9.61158	10.6137	9.73564	8.45878	9.30813
210052_s_at	TPX2	TPX2, microtubule-associated, homolog (Xenopus laevis)	---	0000922 // spindle pole // inferred from direct assay /// 0005634 // nucleus // traceable author statement /// 0005634 // nucleus // inferred from electronic annotation /// 0005819 // spindle // inferred from electronic annotation /// 0005819 // spindle // traceable author statement /// 0015630 // microtubule cytoskeleton // inferred from direct assay	0005515 // protein binding // inferred from physical interaction /// 0005524 // ATP binding // traceable author statement /// 0005525 // GTP binding // traceable author statement	0007067 // mitosis // traceable author statement /// 0008283 // cell proliferation // traceable author statement	20q11	0.000299969148444839	0.00452680714925847	-1.77271	0.292659	7.70586	7.43494	6.79216	7.03785	6.22572	9.69397	9.09081	8.757	9.25762	10.0121	9.64356	9.64109	10.2707	8.25358	9.33728	8.53871	9.34933	8.45614	8.09768	7.83999	8.73839	8.81919	8.02881	6.78562	7.62872
214651_s_at	HOXA9	homeobox A9	---	0005634 // nucleus // inferred from electronic annotation /// 0005634 // nucleus // non-traceable author statement /// 0005634 // nucleus // inferred from direct assay	0003677 // DNA binding // inferred from electronic annotation /// 0003700 // transcription factor activity // inferred from electronic annotation /// 0005515 // protein binding // inferred from physical interaction /// 0016563 // transcription activator activity // inferred from electronic annotation /// 0030528 // transcription regulator activity // inferred from electronic annotation /// 004356…	0006350 // transcription // inferred from electronic annotation /// 0006355 // regulation of transcription, DNA-dependent // inferred from electronic annotation /// 0007275 // multicellular organismal development // traceable author statement /// 0007275 // multicellular organismal development // inferred from electronic annotation /// 0045449 // regulation of transcription // inferred from elect…	7p15	0.000133139689928811	0.00260013982684502	-1.78294	0.29059	5.51695	6.03823	4.92778	5.64348	4.7166	6.29958	8.43143	8.07428	6.72744	7.07062	7.9553	7.54683	7.97096	7.89804	7.62361	7.02983	7.8503	5.58512	7.48982	7.13887	7.2237	6.674	6.87644	5.81373	5.75111
210559_s_at	CDC2	cell division cycle 2, G1 to S and G2 to M	Cell_cycle_KEGG // GenMAPP	0005634 // nucleus // inferred from direct assay /// 0005634 // nucleus // inferred from electronic annotation /// 0005634 // nucleus // traceable author statement /// 0005654 // nucleoplasm // not recorded /// 0005737 // cytoplasm // inferred from direct assay /// 0005829 // cytosol // not recorded /// 0005876 // spindle microtubule // inferred from direct assay /// 0030496 // midbody // inferre…	0000166 // nucleotide binding // inferred from electronic annotation /// 0004672 // protein kinase activity // inferred from electronic annotation /// 0004672 // protein kinase activity // non-traceable author statement /// 0004674 // protein serine/threonine kinase activity // inferred from electronic annotation /// 0004693 // cyclin-dependent protein kinase activity // not recorded /// 0004693 …	0006468 // protein amino acid phosphorylation // inferred from electronic annotation /// 0006916 // anti-apoptosis // inferred from direct assay /// 0007049 // cell cycle // inferred from electronic annotation /// 0007067 // mitosis // inferred from electronic annotation /// 0007095 // mitotic cell cycle G2/M transition DNA damage checkpoint // inferred from electronic annotation /// 0031145 // a…	10q21	0.000842716518876815	0.00868887839338827	-1.80267	0.286644	8.67669	7.79934	6.43492	7.2651	6.3734	9.34398	10.061	9.05419	9.57778	11.2146	9.47632	10.805	9.91904	8.96048	8.839	8.93182	9.15019	8.92603	8.16009	8.69284	8.49447	8.56175	9.04509	7.134	7.90354
213906_at	MYBL1	v-myb myeloblastosis viral oncogene homolog (avian)-like 1	---	0005634 // nucleus // inferred from electronic annotation /// 0005634 // nucleus // non-traceable author statement /// 0005634 // nucleus // inferred from direct assay /// 0005730 // nucleolus // inferred from direct assay	0003677 // DNA binding // inferred from electronic annotation /// 0016563 // transcription activator activity // non-traceable author statement /// 0030528 // transcription regulator activity // inferred from electronic annotation	0006350 // transcription // inferred from electronic annotation /// 0006355 // regulation of transcription, DNA-dependent // non-traceable author statement /// 0006355 // regulation of transcription, DNA-dependent // inferred from electronic annotation /// 0045449 // regulation of transcription // inferred from electronic annotation	8q13	3.89474968469727e-05	0.00104278781880604	-1.81883	0.283452	4.77722	4.79974	4.47261	4.63639	4.42074	6.9959	7.63512	7.35609	6.39658	6.23825	8.07875	6.3735	6.9475	5.33674	7.33347	6.44514	6.8443	5.68125	6.53152	6.19843	5.81495	5.84905	5.62603	5.13006	5.99068
205885_s_at	ITGA4	integrin, alpha 4 (antigen CD49D, alpha 4 subunit of VLA-4 receptor)	Integrin-mediated_cell_adhesion_KEGG // GenMAPP	0008305 // integrin complex // inferred from electronic annotation /// 0009897 // external side of plasma membrane // inferred from electronic annotation /// 0009986 // cell surface // inferred from direct assay /// 0016020 // membrane // inferred from electronic annotation /// 0016021 // integral to membrane // inferred from electronic annotation	0001968 // fibronectin binding // inferred from electronic annotation /// 0004872 // receptor activity // inferred from electronic annotation /// 0005509 // calcium ion binding // inferred from electronic annotation /// 0005515 // protein binding // inferred from electronic annotation /// 0005515 // protein binding // inferred from physical interaction /// 0042802 // identical protein binding // …	0001974 // blood vessel remodeling // inferred from electronic annotation /// 0007155 // cell adhesion // inferred from electronic annotation /// 0007157 // heterophilic cell adhesion // inferred from electronic annotation /// 0007159 // leukocyte adhesion // inferred from electronic annotation /// 0007159 // leukocyte adhesion // inferred from direct assay /// 0007229 // integrin-mediated signal…	2q31	0.000654700667499401	0.00729572726748668	-1.86914	0.273737	6.14095	5.98064	4.3126	4.72602	4.97541	8.32079	7.18073	5.76542	7.33628	8.14078	5.6464	8.30838	8.16103	8.08273	7.34213	6.17501	6.61175	5.95929	6.77329	7.07262	5.90449	8.98556	6.93858	6.48793	6.73204
208079_s_at	AURKA	aurora kinase A	---	0005634 // nucleus // traceable author statement /// 0005813 // centrosome // inferred from electronic annotation /// 0005819 // spindle // traceable author statement /// 0005819 // spindle // inferred from electronic annotation	0000166 // nucleotide binding // inferred from electronic annotation /// 0004672 // protein kinase activity // inferred from electronic annotation /// 0004672 // protein kinase activity // traceable author statement /// 0004674 // protein serine/threonine kinase activity // inferred from electronic annotation /// 0005515 // protein binding // inferred from direct assay /// 0005515 // protein bind…	0000278 // mitotic cell cycle // inferred from electronic annotation /// 0006468 // protein amino acid phosphorylation // inferred from electronic annotation /// 0006468 // protein amino acid phosphorylation // traceable author statement /// 0007049 // cell cycle // inferred from electronic annotation /// 0007049 // cell cycle // non-traceable author statement /// 0007051 // spindle organization …	20q13	0.000174024334293017	0.0031091956350347	-1.92023	0.264212	6.72318	6.33837	6.05527	6.40318	5.70008	8.7349	8.85134	8.31781	8.34346	9.69189	8.97799	9.35111	8.66512	7.38862	8.31172	7.91506	7.47098	8.24951	8.09652	7.18834	8.30804	9.28982	7.48328	5.99556	6.65384
218039_at	NUSAP1	nucleolar and spindle associated protein 1	---	0005634 // nucleus // inferred from electronic annotation /// 0005737 // cytoplasm // inferred from electronic annotation /// 0005874 // microtubule // inferred from electronic annotation	0003677 // DNA binding // inferred from electronic annotation	0000070 // mitotic sister chromatid segregation // inferred from direct assay /// 0000281 // cytokinesis after mitosis // inferred from direct assay /// 0007049 // cell cycle // inferred from electronic annotation /// 0007067 // mitosis // inferred from electronic annotation /// 0007076 // mitotic chromosome condensation // inferred from direct assay /// 0040001 // establishment of mitotic spindl…	15q15	0.000474494606962402	0.00610589959346967	-1.92395	0.263531	8.72571	8.52446	7.103	7.62553	6.13299	9.90508	10.4056	10.0919	10.078	10.5196	10.1183	11.0795	9.71992	8.74979	10.2408	9.34204	9.84974	9.09276	8.85952	8.89297	9.26985	9.99252	9.55483	7.03344	8.1297
202086_at	MX1	myxovirus (influenza virus) resistance 1, interferon-inducible protein p78 (mouse)	---	0005737 // cytoplasm // inferred from electronic annotation /// 0005829 // cytosol // inferred from direct assay	0000166 // nucleotide binding // inferred from electronic annotation /// 0003924 // GTPase activity // inferred from electronic annotation /// 0005515 // protein binding // inferred from physical interaction /// 0005525 // GTP binding // inferred from electronic annotation /// 0005525 // GTP binding // traceable author statement	0006917 // induction of apoptosis // traceable author statement /// 0006952 // defense response // traceable author statement /// 0007165 // signal transduction // traceable author statement /// 0009615 // response to virus // inferred from electronic annotation	21q22	0.000305133967418871	0.00456326473797591	-1.98044	0.253413	6.94491	7.13203	7.63382	7.66701	7.33551	9.78747	8.27043	9.48533	10.1546	8.81306	7.61112	8.15003	9.23858	8.53552	10.6741	10.4705	9.30965	9.84521	9.21459	10.6032	9.12219	8.26685	8.46621	8.83996	11.6033
204962_s_at	CENPA	centromere protein A	---	0000775 // chromosome, centromeric region // inferred from direct assay /// 0000775 // chromosome, centromeric region // inferred from electronic annotation /// 0000775 // chromosome, centromeric region // traceable author statement /// 0000777 // condensed chromosome kinetochore // inferred from electronic annotation /// 0000786 // nucleosome // inferred from electronic annotation /// 0000939 //…	0003677 // DNA binding // inferred from electronic annotation /// 0003682 // chromatin binding // traceable author statement /// 0005515 // protein binding // inferred from physical interaction	0006334 // nucleosome assembly // inferred from electronic annotation /// 0044419 // interspecies interaction between organisms // inferred from electronic annotation	2p23	0.000574963051170155	0.00672139904889055	-2.01231	0.247876	6.34142	6.0394	5.03589	5.40985	4.93337	8.20661	9.17454	7.43387	7.78248	7.9766	8.53719	9.24307	9.00452	6.96467	7.63	6.40335	8.49503	7.21659	6.84402	6.78844	7.08579	8.43404	6.74089	5.49177	5.83246
209714_s_at	CDKN3	cyclin-dependent kinase inhibitor 3	---	---	0004721 // phosphoprotein phosphatase activity // inferred from electronic annotation /// 0004722 // protein serine/threonine phosphatase activity // inferred from direct assay /// 0004725 // protein tyrosine phosphatase activity // inferred from direct assay /// 0004725 // protein tyrosine phosphatase activity // inferred from electronic annotation /// 0005515 // protein binding // inferred from…	0000079 // regulation of cyclin-dependent protein kinase activity // traceable author statement /// 0000082 // G1/S transition of mitotic cell cycle // traceable author statement /// 0007049 // cell cycle // inferred from electronic annotation /// 0007050 // cell cycle arrest // inferred from direct assay /// 0007050 // cell cycle arrest // traceable author statement /// 0008285 // negative regul…	14q22	0.000265152797093297	0.00411358545023246	-2.04705	0.241978	7.4726	6.93348	5.80156	6.61707	5.66111	8.48487	9.66445	8.61854	9.32811	9.3694	8.90886	10.2019	9.42266	8.10831	9.10109	9.03388	8.22192	8.631	8.09924	7.7918	7.92159	9.22364	7.91005	5.97437	6.86869
214710_s_at	CCNB1	cyclin B1	Cell_cycle_KEGG // GenMAPP /// G1_to_S_cell_cycle_Reactome // GenMAPP	0005634 // nucleus // inferred from direct assay /// 0005634 // nucleus // inferred from electronic annotation /// 0005654 // nucleoplasm // not recorded /// 0005737 // cytoplasm // inferred from electronic annotation /// 0005813 // centrosome // inferred from electronic annotation /// 0005829 // cytosol // not recorded	0005515 // protein binding // inferred from physical interaction	0000086 // G2/M transition of mitotic cell cycle // non-traceable author statement /// 0007049 // cell cycle // inferred from electronic annotation /// 0007067 // mitosis // inferred from electronic annotation /// 0031145 // anaphase-promoting complex-dependent proteasomal ubiquitin-dependent protein catabolic process // not recorded /// 0051301 // cell division // inferred from electronic annota…	5q13	0.000382594124554168	0.00537236955854521	-2.05496	0.240655	7.2456	6.90352	5.13276	6.39054	5.30137	8.62696	9.181	8.2623	8.52296	9.19148	8.91626	9.44871	9.49851	7.09616	8.46502	8.93751	8.67662	8.43703	7.29337	7.12792	8.87453	8.39532	7.62701	5.9417	6.474
205483_s_at	ISG15	ISG15 ubiquitin-like modifier	---	0005576 // extracellular region // inferred from electronic annotation /// 0005615 // extracellular space // non-traceable author statement /// 0005737 // cytoplasm // non-traceable author statement /// 0005737 // cytoplasm // inferred from electronic annotation	0005515 // protein binding // non-traceable author statement /// 0005515 // protein binding // inferred from electronic annotation /// 0031386 // protein tag // inferred from electronic annotation	0006464 // protein modification process // inferred from electronic annotation /// 0006511 // ubiquitin-dependent protein catabolic process // inferred from electronic annotation /// 0007267 // cell-cell signaling // non-traceable author statement /// 0009615 // response to virus // inferred from electronic annotation /// 0019941 // modification-dependent protein catabolic process // inferred fro…	1p36	0.000111622738382313	0.00240399688165019	-2.08432	0.235807	8.75437	8.33949	8.67657	8.53429	7.90161	10.4604	10.1103	9.9335	11.24	9.3069	8.7816	10.7404	11.0686	10.3395	11.9344	12.0862	11.0396	11.7242	10.2367	11.2725	9.19469	10.0469	9.50824	9.6958	11.7913
208808_s_at	HMGB2	high-mobility group box 2	---	0000228 // nuclear chromosome // traceable author statement /// 0000793 // condensed chromosome // inferred from direct assay /// 0005634 // nucleus // inferred from direct assay /// 0005634 // nucleus // inferred from electronic annotation /// 0005694 // chromosome // inferred from electronic annotation /// 0005730 // nucleolus // inferred from direct assay /// 0005737 // cytoplasm // inferred f…	0003677 // DNA binding // inferred from electronic annotation /// 0003677 // DNA binding // traceable author statement /// 0003690 // double-stranded DNA binding // traceable author statement /// 0003697 // single-stranded DNA binding // traceable author statement /// 0003700 // transcription factor activity // traceable author statement /// 0005515 // protein binding // inferred from physical in…	0006260 // DNA replication // traceable author statement /// 0006268 // DNA unwinding during replication // traceable author statement /// 0006281 // DNA repair // traceable author statement /// 0006288 // base-excision repair, DNA ligation // inferred from direct assay /// 0006325 // establishment or maintenance of chromatin architecture // non-traceable author statement /// 0006334 // nucleosom…	4q34	3.41043235663534e-05	0.000976089260692184	-2.09681	0.233775	8.38126	8.00111	5.63429	7.25836	7.6229	9.51621	10.707	10.3728	9.82993	8.67003	10.209	10.5311	9.75408	9.67252	9.89509	8.43074	10.2858	8.38203	9.01145	8.83801	8.92017	9.84552	9.32331	8.16859	9.16443
203764_at	DLGAP5	discs, large (Drosophila) homolog-associated protein 5	---	0005634 // nucleus // inferred from direct assay /// 0005634 // nucleus // inferred from sequence or structural similarity /// 0005634 // nucleus // inferred from electronic annotation /// 0005737 // cytoplasm // inferred from electronic annotation /// 0031616 // spindle pole centrosome // inferred from direct assay /// 0031616 // spindle pole centrosome // inferred from sequence or structural si…	0004721 // phosphoprotein phosphatase activity // inferred from direct assay /// 0004721 // phosphoprotein phosphatase activity // inferred from sequence or structural similarity /// 0005515 // protein binding // inferred from physical interaction	0000087 // M phase of mitotic cell cycle // inferred from direct assay /// 0000087 // M phase of mitotic cell cycle // inferred from sequence or structural similarity /// 0007049 // cell cycle // inferred from electronic annotation /// 0007079 // mitotic chromosome movement towards spindle pole // non-traceable author statement /// 0007267 // cell-cell signaling // inferred from electronic annota…	14q22	0.000456476882088214	0.00596654822257036	-2.18025	0.220637	6.53365	5.84994	4.58169	5.35498	4.22934	7.74845	8.7242	7.19459	8.57876	8.70518	8.16502	9.42783	8.2245	6.91753	8.01355	7.32378	6.96514	7.65929	6.34269	6.93318	7.09345	8.45643	6.53991	5.00235	5.78766
203820_s_at	IGF2BP3	insulin-like growth factor 2 mRNA binding protein 3	---	0005634 // nucleus // inferred from electronic annotation /// 0005737 // cytoplasm // traceable author statement /// 0005737 // cytoplasm // inferred from direct assay /// 0005737 // cytoplasm // inferred from electronic annotation	0000166 // nucleotide binding // inferred from electronic annotation /// 0003676 // nucleic acid binding // inferred from electronic annotation /// 0003723 // RNA binding // traceable author statement /// 0003723 // RNA binding // inferred from electronic annotation /// 0045182 // translation regulator activity // inferred from sequence or structural similarity /// 0048027 // mRNA 5'-UTR binding …	0006412 // translation // traceable author statement /// 0006417 // regulation of translation // inferred from electronic annotation /// 0009653 // anatomical structure morphogenesis // traceable author statement /// 0017148 // negative regulation of translation // inferred from sequence or structural similarity /// 0042035 // regulation of cytokine biosynthetic process // inferred by curator	7p15	1.53714968020507e-05	0.000579924652077369	-2.46701	0.180866	4.55687	4.51199	4.73276	4.53384	4.50653	6.92606	8.36741	6.91755	7.3721	7.97387	6.66818	7.78208	8.56228	8.22728	5.98418	5.62275	8.10716	6.75641	6.7282	5.8984	6.74151	8.06537	6.79737	5.07375	6.13618
204006_s_at	FCGR3A /// FCGR3B	Fc fragment of IgG, low affinity IIIa, receptor (CD16a) /// Fc fragment of IgG, low affinity IIIb, receptor (CD16b)	---	0005576 // extracellular region // inferred from electronic annotation /// 0005886 // plasma membrane // not recorded /// 0005886 // plasma membrane // traceable author statement /// 0005886 // plasma membrane // inferred from electronic annotation /// 0016020 // membrane // inferred from electronic annotation /// 0016021 // integral to membrane // inferred from electronic annotation /// 0031225 …	0004872 // receptor activity // inferred from electronic annotation /// 0019864 // IgG binding // inferred from electronic annotation	0006955 // immune response // traceable author statement	1q23	0.000509981329820041	0.00636518050752833	-2.48337	0.178826	8.38042	6.52586	5.5029	6.17746	6.07366	7.90348	10.7906	8.45749	8.80621	8.8699	8.48754	7.83166	9.08435	6.51659	8.90087	8.33546	9.03007	10.0824	11.3406	10.1388	8.28992	6.94646	9.79139	10.3431	10.3617
